# Supplementary material for: Removal of Cr(vi) and p-chlorophenol and generation of electricity using constructed wetland-microbial fuel cells based on Leersia hexandra Swartz: p-chlorophenol concentration and hydraulic retention time effects
Source: Royal Society of Chemistry journal article supplement (doi:10.1039/d2ra01828d), 2022-01-01
Supplement: d2ra01828d1.pdf [file d2ra01828d1.pdf]

***Supplementary Material***

**Removal of Cr(VI) and p-chlorophenol and generation of electricity using  
constructed wetland-microbial fuel cells based on *Leersia hexandra* Swartz: p-  
chlorophenol concentration and hydraulic retention time effects**

Yian Wang,<sup>a,b</sup> Xuehong Zhang,<sup>a,b</sup> Hua Lin,<sup>a,b,\*</sup>

<sup>a</sup> College of Environmental Science and Engineering, Guilin University of  
Technology, 319 Yanshan Street, Guilin 541006, China

<sup>b</sup> Guangxi Collaborative Innovation Center for Water Pollution Control and Water  
Safety in Karst Areas, Guilin University of Technology, 319 Yanshan Street, Guilin  
541006, China

**\*Corresponding author:**

Hua Lin

**Corresponding author's address:**

College of Environmental Science and Engineering, Guilin University of Technology,  
319 Yanshan Street, Guilin 541006, China

Email: linhua5894@163.com

Tel/Fax: +86 13737300704

## Summary

Page: 10; Results and discussion; Figures: 11.

### ➤ Results and discussion

#### ➤ Figures and Tables

1. Fig. S1. The effect of PVDF and PTFE to filter 2 g/L 4-CP.
2. Fig. S2. ORP of sample taps at different concentrations of 4-CP (the suffix E represents the effluent).
3. Fig. S3. (a) CV, (b) LSV, (c) TAF and (d) EIS figure at different concentrations of 4-CP.
4. Fig. S4. H<sub>2</sub>O<sub>2</sub> content at the cathode at different concentrations of 4-CP.
5. Fig. S5. Total phenols content of *L. hexandra* at different concentrations of 4-CP.
6. Fig. S6. (a) Plant height and root length, (b) dry weight and (c) chlorophyll and carotenoid content of *L. hexandra* at different concentrations of 4-CP.
7. Fig. S7. ORP of sample taps at different HRT (the suffix E represents the effluent).
8. Fig. S8. (a) CV, (b) LSV, (c) TAF and (d) EIS figure of DLCW-MFC at different HRT.
9. Fig. S9. H<sub>2</sub>O<sub>2</sub> content at the cathode at different HRT.
10. Fig. S10. Total phenols content of *L. hexandra* at different HRT.
11. Fig. S11. (a) Plant height and root length, (b) dry weight and (c) chlorophyll and carotenoid content of *L. hexandra* at different HRT.

## Results and discussion

PVDF filters produce filtration loss for certain substances (such as saccharin sodium, salicylic acid and benzoic acid) as the previous study,<sup>1</sup> therefore comparing PVDF and PTFE materials to determine the appropriate filter for 4-CP analysis is necessary. Fig. S1 shows the filtration loss of 4-CP by PVDF was 15.3% more than that of PTFE (2.3%), mainly because PVDF (granular pore structure) and PTFE (fibrous network with interconnected pore channels) have different pore morphology.<sup>2</sup> The lower filtration loss of PTFE may be due to the relatively strong adsorption of PVDF with hydroxyl and other functional groups.<sup>3</sup> Some studies indicate that PTFE has a lower adsorption effect on substances containing a single number of polar or non-polar substituents and has a lower filtration loss than other filters.<sup>4</sup> The PVDF membrane no longer has adsorbed substance effect when the matrix components of the sample gradually occupy the available active adsorption sites of filter material. To avoid collecting too many water samples from the sample tap of DLCW-MFC and prevent the filter function failure caused by the blocking of the filter due to the particulate matter contained in a large number of water samples. Therefore, the PTFE filter was selected to filter the water samples to determine 4-CP.

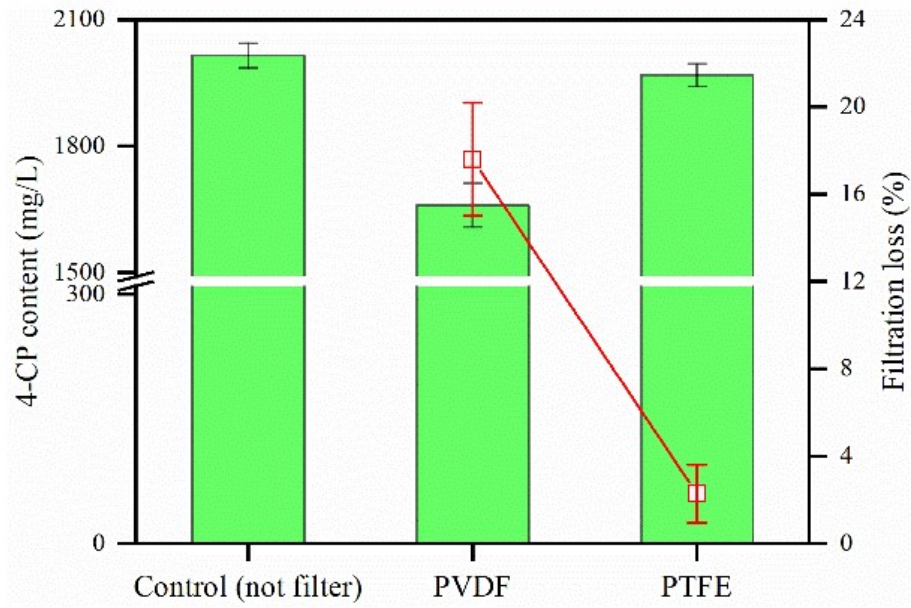

Fig. S1. The effect of PVDF and PTFE to filter 2 g/L 4-CP.

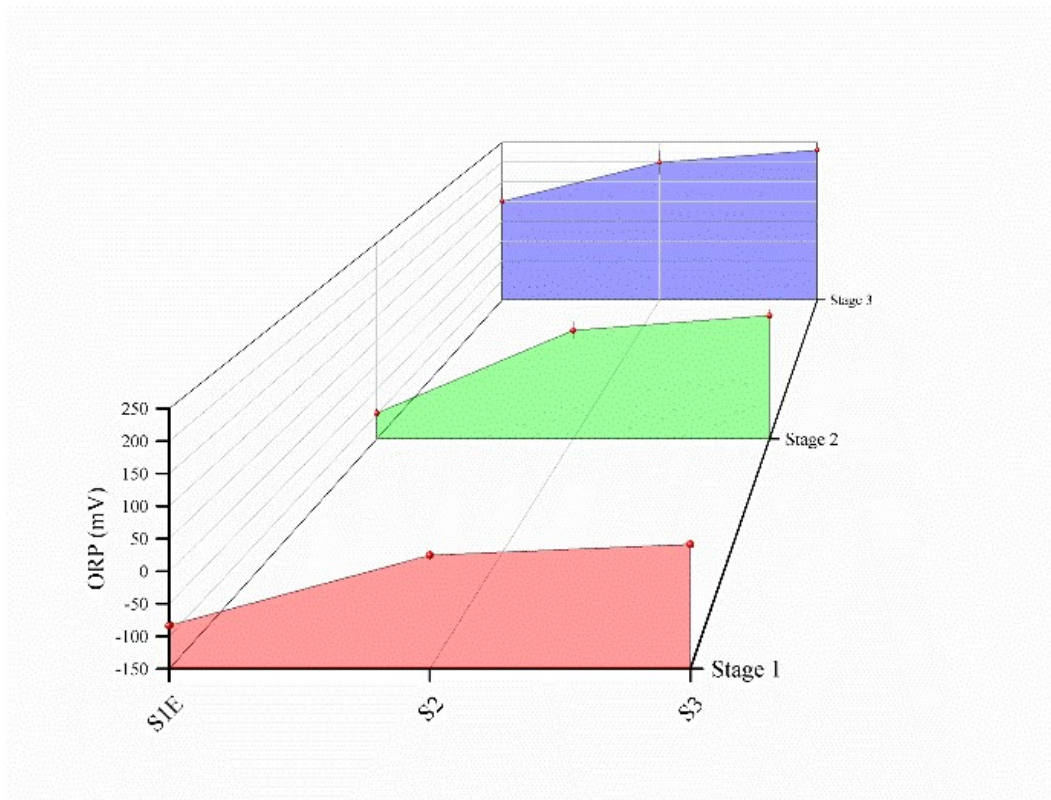

Fig. S2. ORP of sample taps at different concentrations of 4-CP (the suffix E represents the effluent).

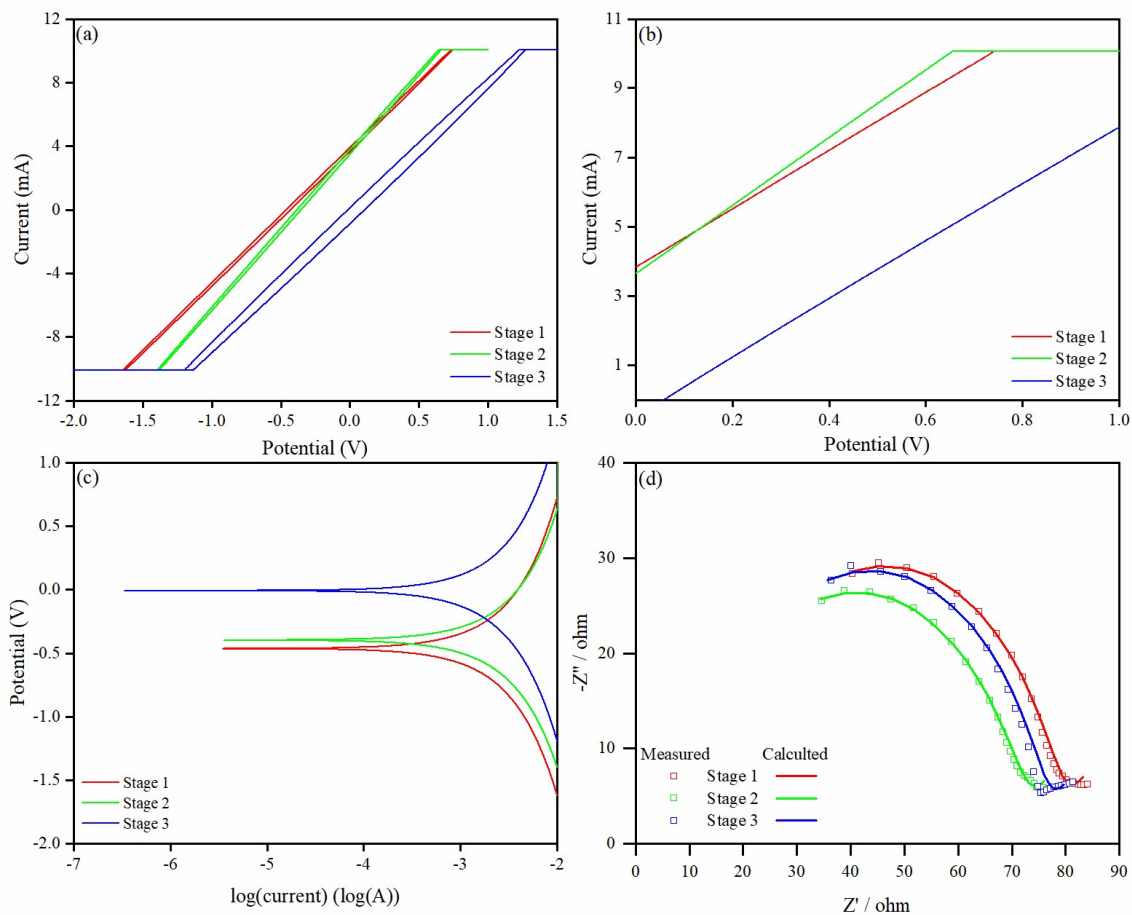

Fig. S3. (a) CV, (b) LSV, (c) TAF and (d) EIS figure at different concentrations of 4-CP.

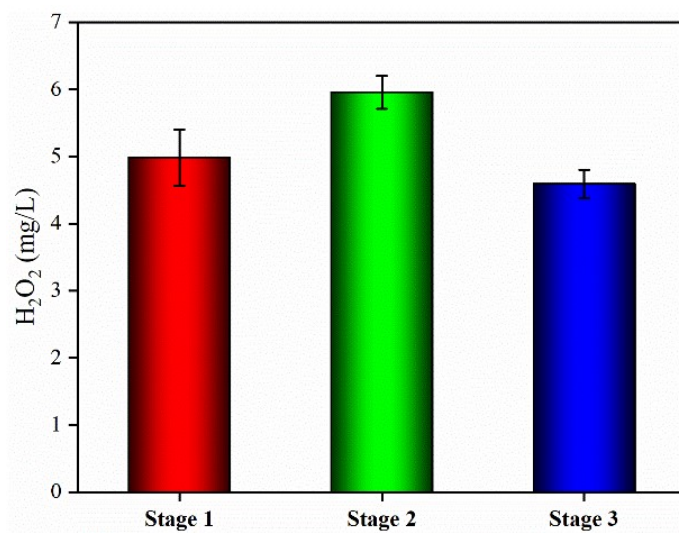

Fig. S4.  $H_2O_2$  content at the cathode at different concentrations of 4-CP.

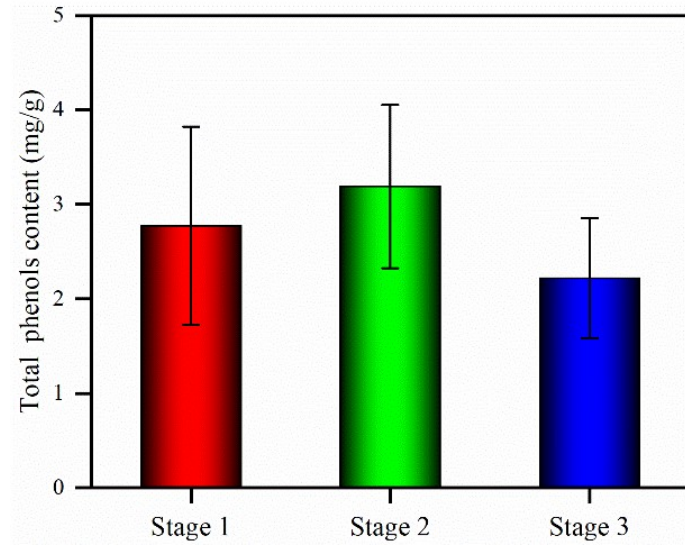

Fig. S5. Total phenols content of *L. hexandra* at different concentrations of 4-CP.

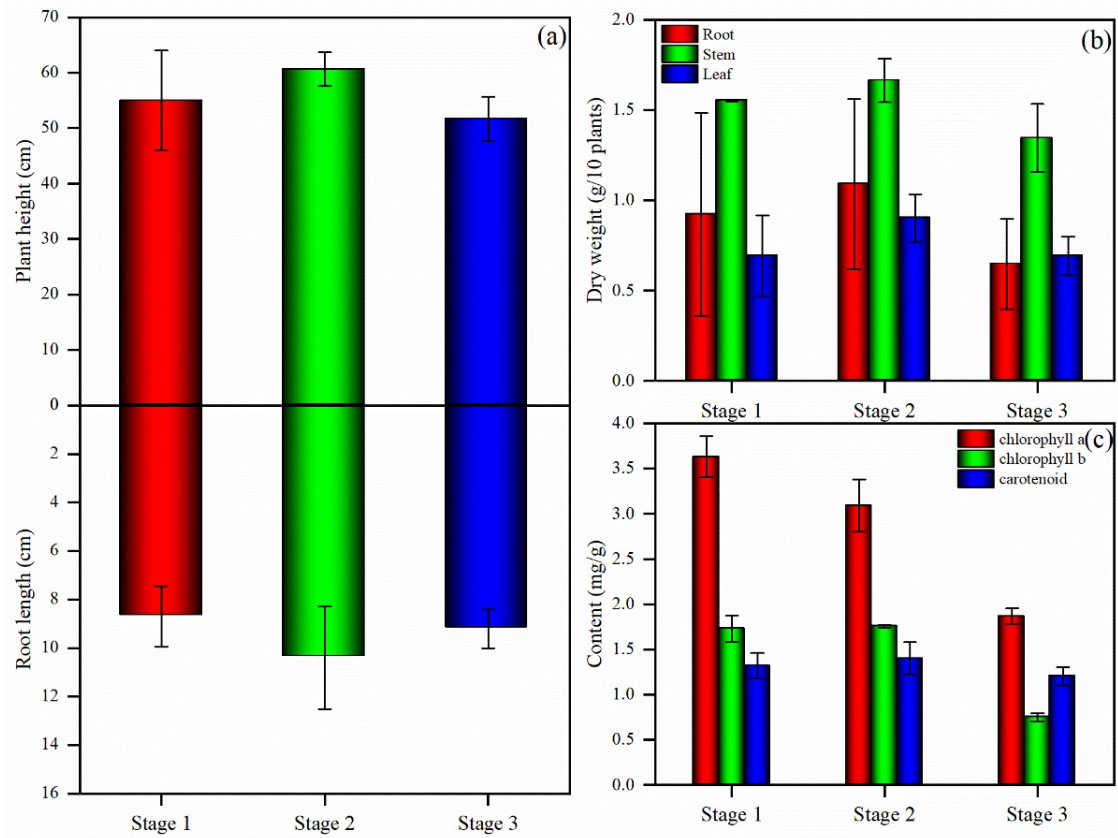

Fig. S6. (a) Plant height and root length, (b) dry weight and (c) chlorophyll and carotenoid content of *L. hexandra* at different concentrations of 4-CP.

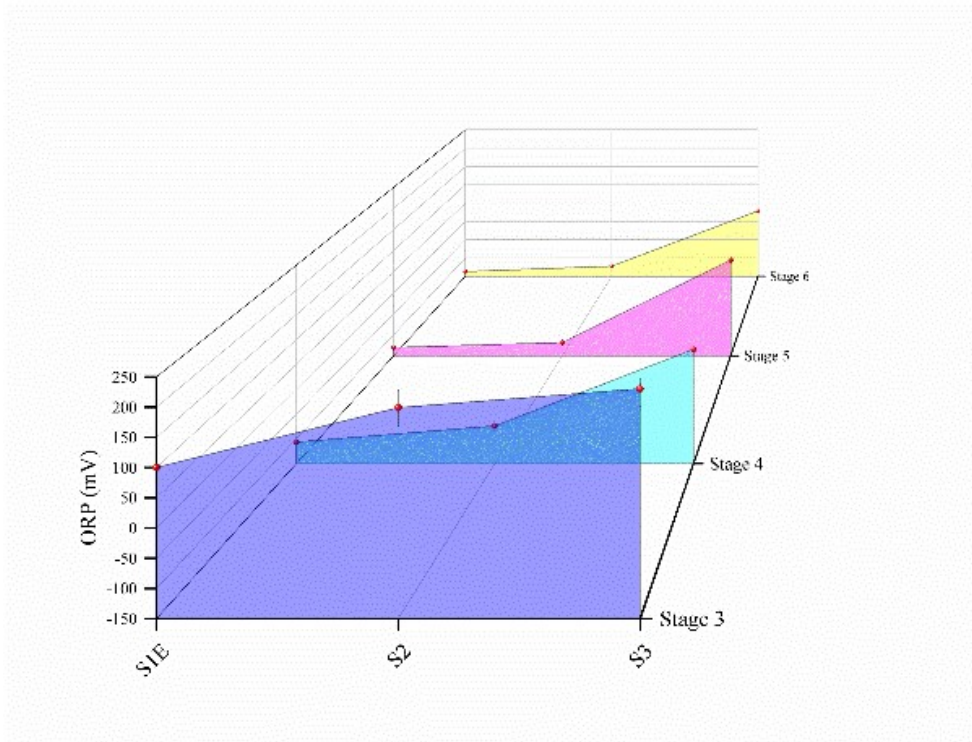

Fig. S7. ORP of sample taps at different HRT (the suffix E represents the effluent).

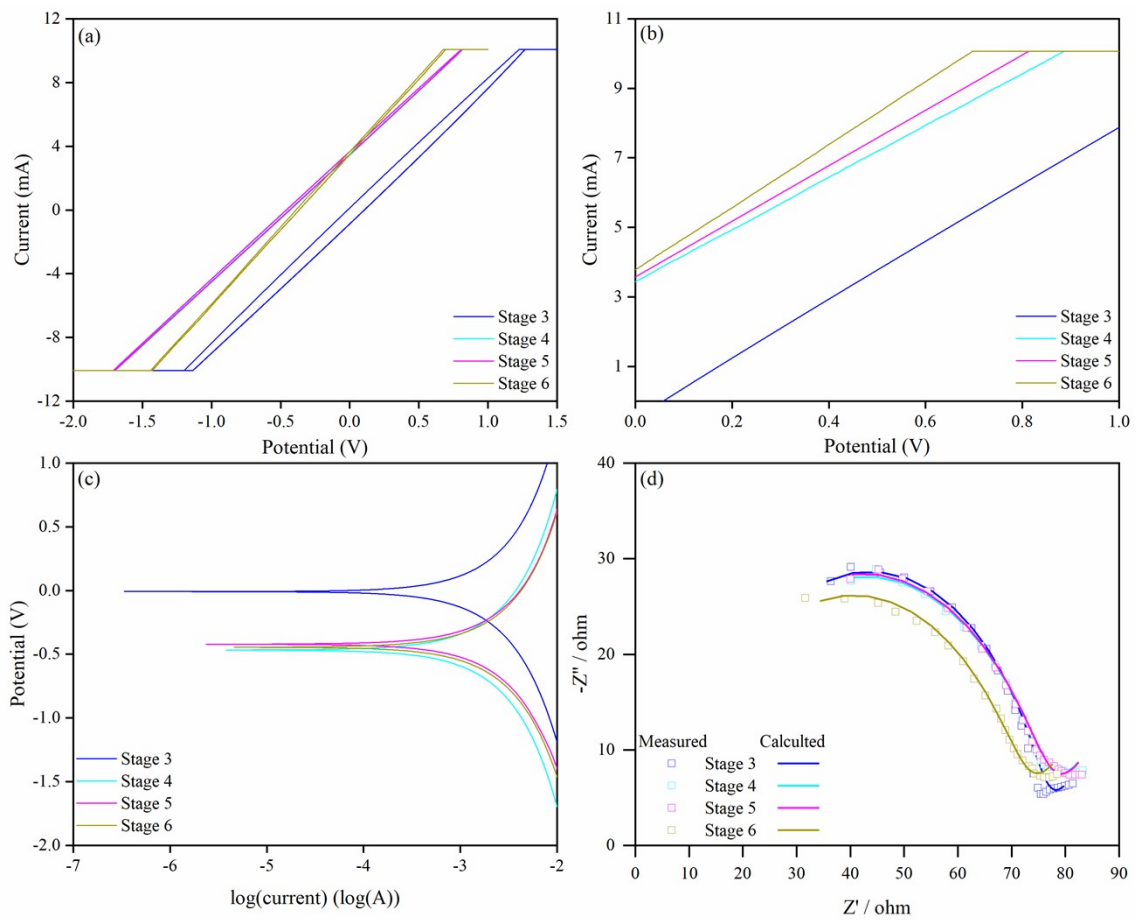

Fig. S8. (a) CV, (b) LSV, (c) TAF and (d) EIS figure of DLCW-MFC at different HRT.

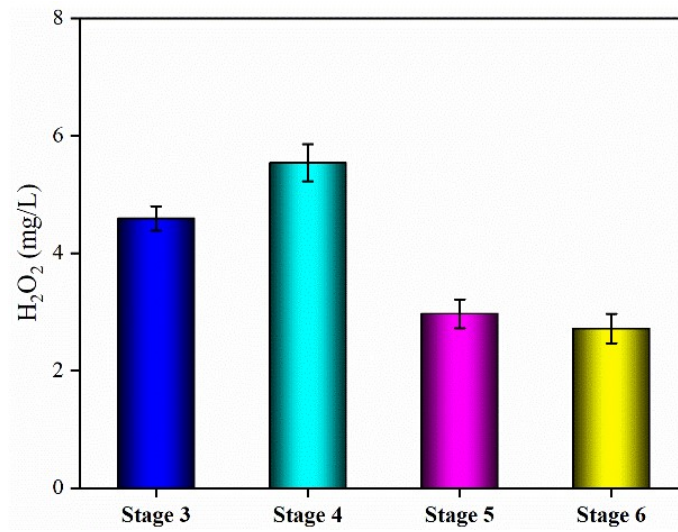

Fig. S9. H<sub>2</sub>O<sub>2</sub> content at the cathode at different HRT.

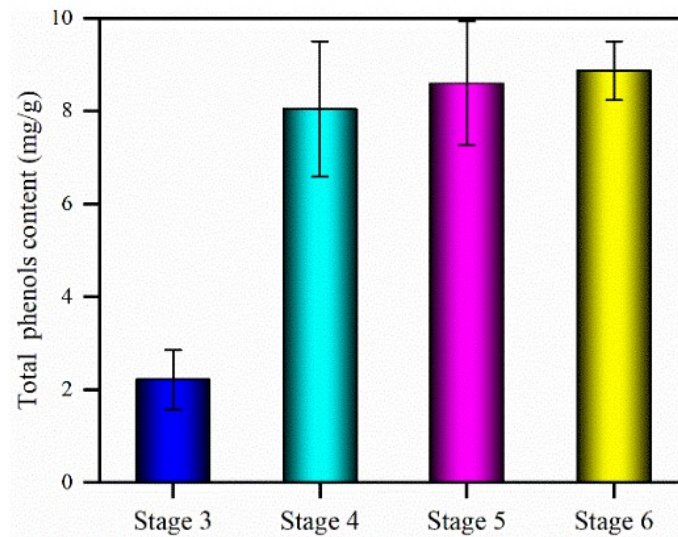

Fig. S10. Total phenols content of *L. hexandra* at different HRT.



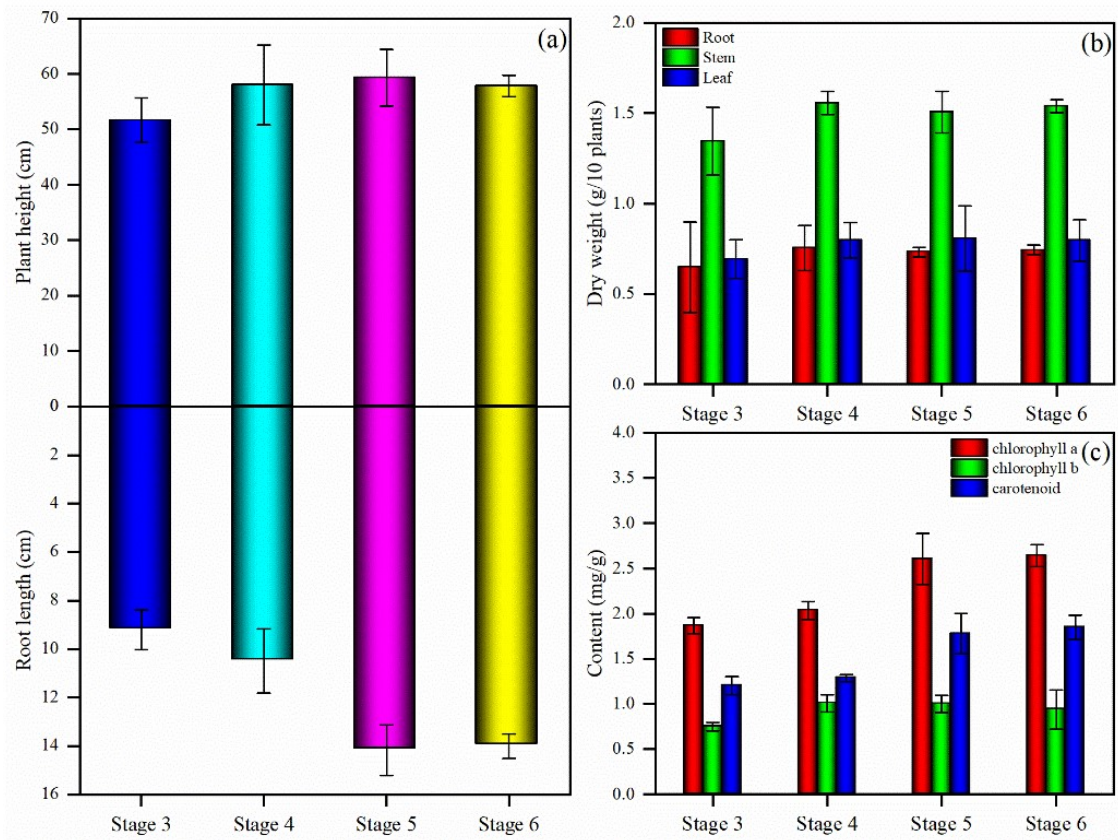

Fig. S11. (a) Plant height and root length, (b) dry weight and (c) chlorophyll and carotenoid content of *L. hexandra* at different HRT.

## References

1. M. Carlson and R. D. Thompson, *J. Chromatogr. Sci.*, 2000, **38**, 77-83.
2. K. Xiao, J. Y. Sun, Y. H. Mo, Z. Fang, P. Liang, X. Huang, J. B. Ma and B. R. Ma, *Desalin.*, 2014, **343**, 217-225.
3. L. G. Shen, S. S. Feng, J. X. Li, J. R. Chen, F. Q. Li, H. J. Lin and G. Y. Yu, *Sci. rep.*, 2017, **7**, 2721.
4. N. Godby and A. Conklin, *Adsorpt. Sci. Technol.*, 2016, **35**, 153-161.
